# Supplementary figures and images for: Inducible depletion of adult skeletal muscle stem cells impairs the regeneration of neuromuscular junctions
Source: eLife journal article supplement (doi:10.7554/elife.09221), 2015-08-27

**A**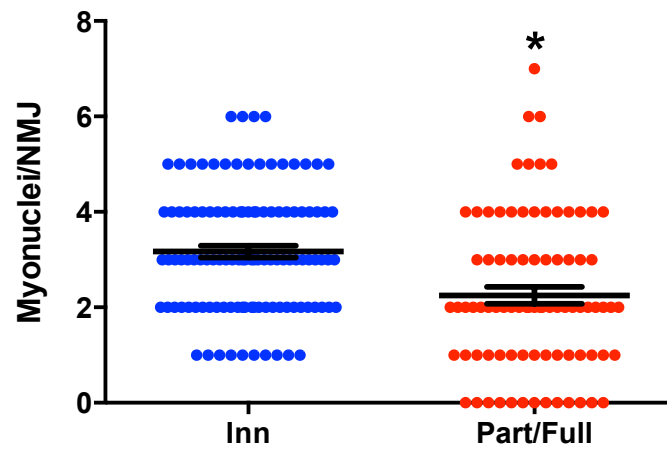**B**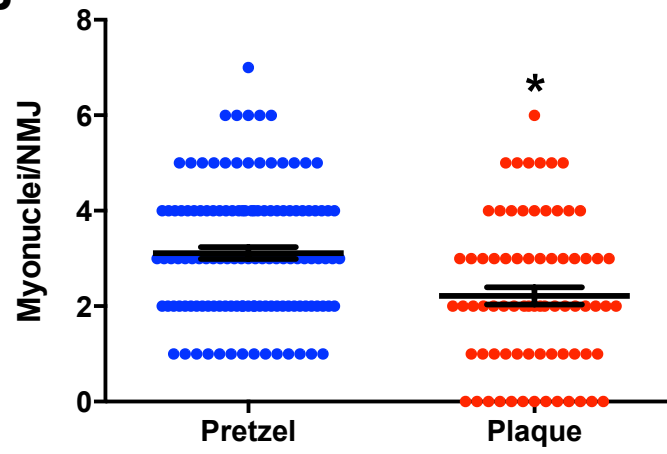

Supplement: supp [file elife-09221-supp-v1.zip]

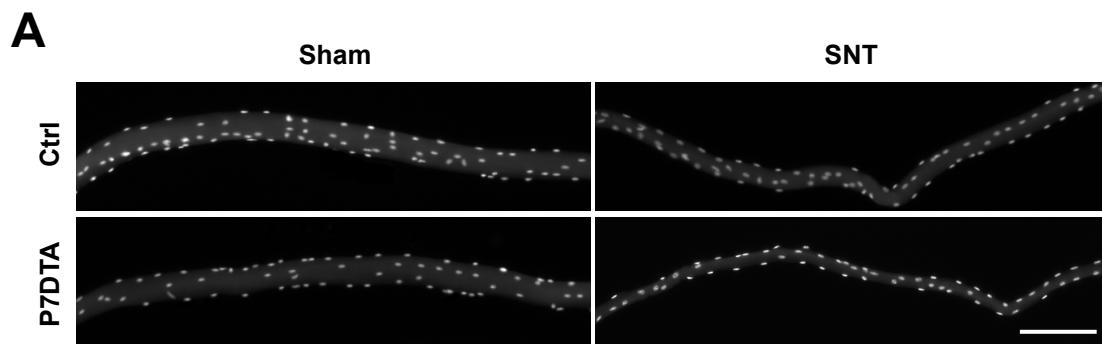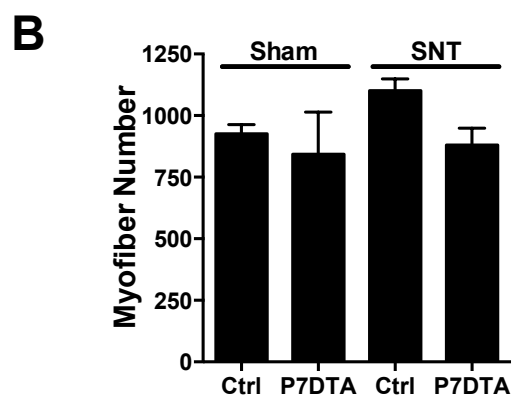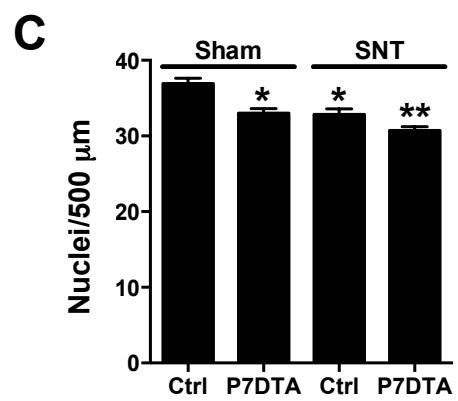

Supplement: supp [file elife-09221-supp-v1.zip]

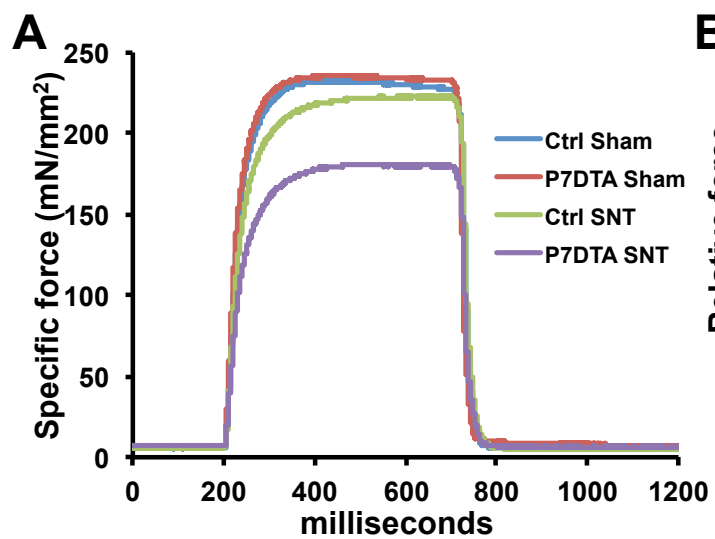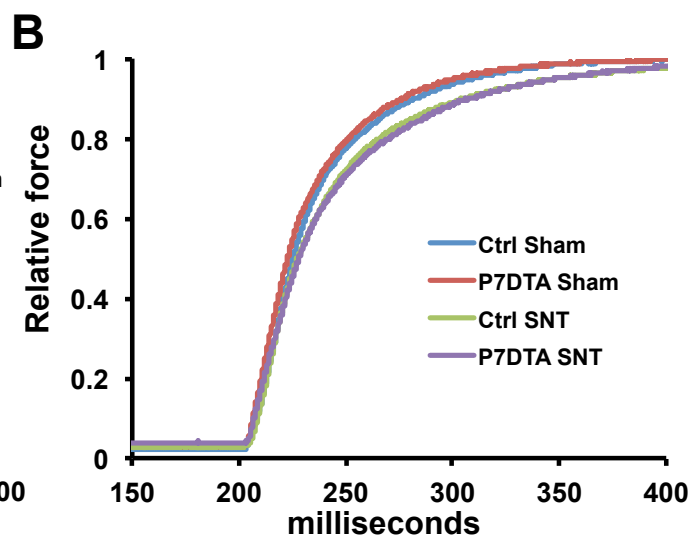

Supplement: supp [file elife-09221-supp-v1.zip]

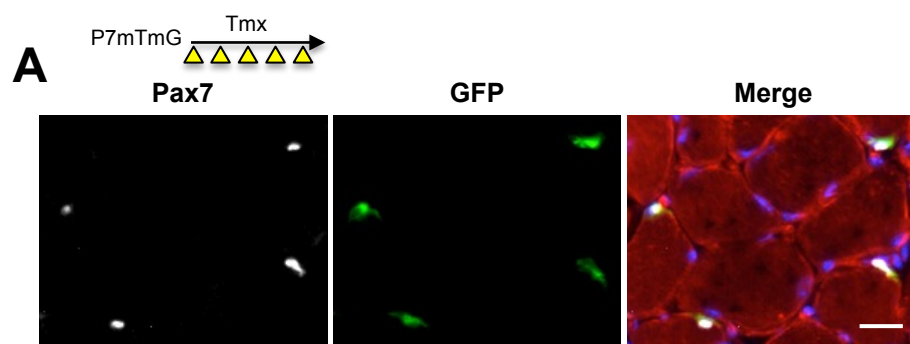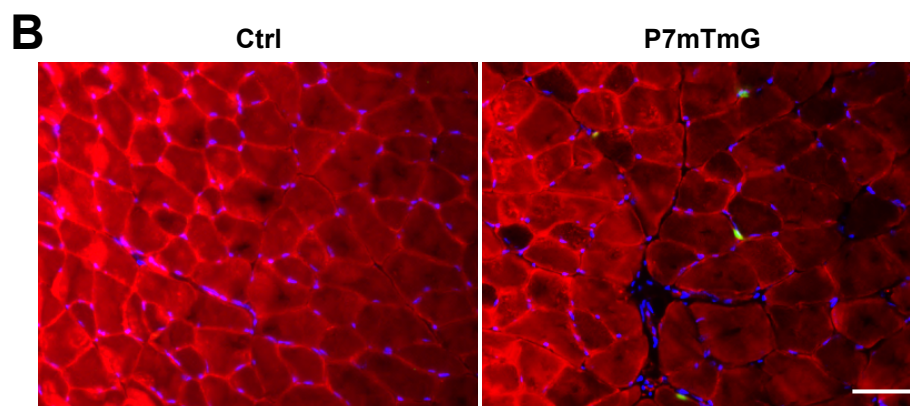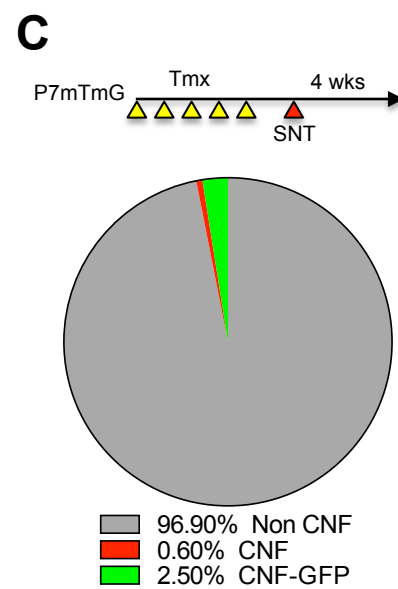

Supplement: supp [file elife-09221-supp-v1.zip]
